# Supplementary material for: Synthesis of comb-like poly(ethyleneimine)s and their application in biomimetic silicification
Source: Royal Society of Chemistry journal article supplement (doi:10.1039/c4py01641f), 2015-01-01
Supplement: c4py01641f1.pdf [file c4py01641f1.pdf]

**Supplementary information for**  
**Synthesis of comb-like poly(ethyleneimine)s and their**  
**application in biomimetic silicification**

Dong-Dong Yao, Ren-Hua Jin\*

Department of Material and Life Chemistry, Kanagawa University,  
3-27-1 Rokkakubashi, Yokohama 221-8686, Japan

Corresponding author: R.-H. Jin, E-mail: [rhjin@kanagawa-u.ac.jp](mailto:rhjin@kanagawa-u.ac.jp)

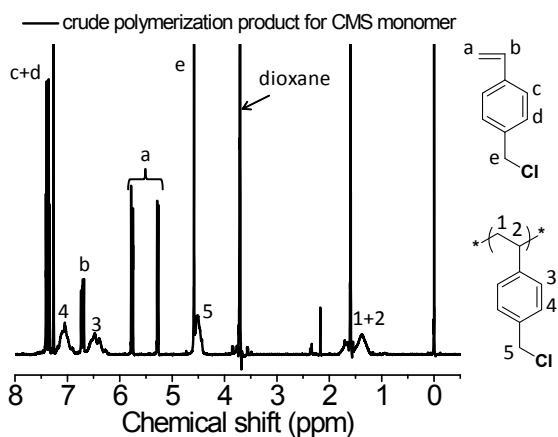

**Fig. S1**  $^1\text{H}$  NMR spectrum of crude polymerization product of CMS monomer before precipitation.

In detail, the conversion was calculated according to the relative integral area ( $S$ ) by following formula:

$$\% \text{Conv.} = S_{\text{poly.}} / (S_{\text{a}} + S_{\text{poly.}}) * 100\% = 63.7\%, \text{ here, } S_{\text{poly.}} = [(S_4 + S_3 + S_b) - 0.5S_a] / 2.$$

Combined with the initial molar ratio of CMS monomer and RAFT agent CDB (100:1), the polymeric degree of PCMS was denoted as 64.

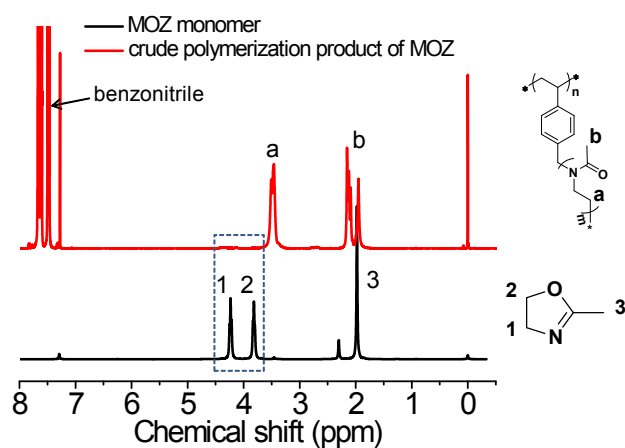

**Fig. S2**  $^1\text{H}$  NMR spectrum of crude polymerization product of MOZ (red line). In comparison, we also gave  $^1\text{H}$  NMR data of pure MOZ monomer (black line). The proton signal disappeared in dash line part (red line), which indicated that the MOZ monomer reacted completely in this polymerization system.

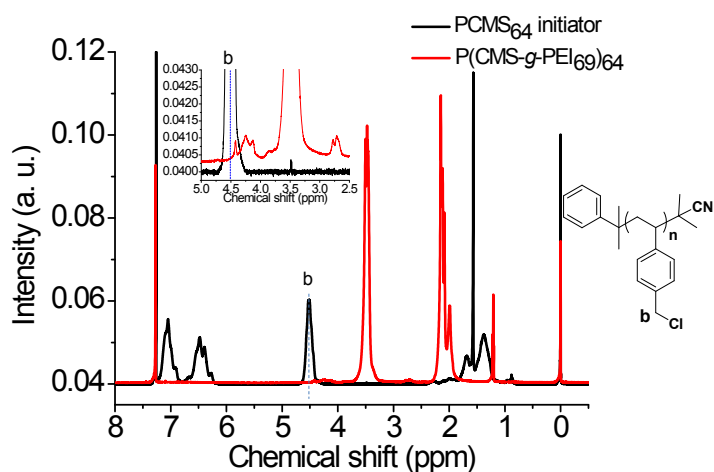

**Fig. S3**  $^1\text{H}$  NMR spectra of PCMS initiator and P(CMS-g-PEI<sub>69</sub>)<sub>64</sub> comb polymer. The proton signal b of initiating group (-CH<sub>2</sub>Cl at 4.5 ppm) nearly completely disappeared after polymerization reaction for MOZ monomer.
